# Supplementary material for: The development of a magnetic iron/nitrogen-doped graphitized carbon composite with boosted microwave attenuation ability as the wideband microwave absorber
Source: Royal Society of Chemistry journal article supplement (doi:10.1039/d0na00548g), 2021-01-01
Supplement: d0na00548g1.pdf [file d0na00548g1.pdf]

Development of magnetic iron/Nitrogen-doped graphitized carbon  
composite with boost microwave attenuation ability as the wideband  
microwave absorber

Cong Chen <sup>a,b,\*</sup>, Wen Chen<sup>a</sup>, Bing Zong<sup>a,b</sup>, Xiaohai Ding <sup>a,b</sup>, Haitao Dong <sup>a,b</sup>,

<sup>a</sup> *School of Physics and Electronic Information Engineering, Qinghai Nationalities  
University, Xining 810007, PR China*

<sup>b</sup> *Asia Silicon (Qinghai) Co., Ltd, Xining, Qinghai 810007, China*

*Corresponding author: Prof. Cong Chen*

*Email: [2016016@qhmu.edu.cn](mailto:2016016@qhmu.edu.cn)*

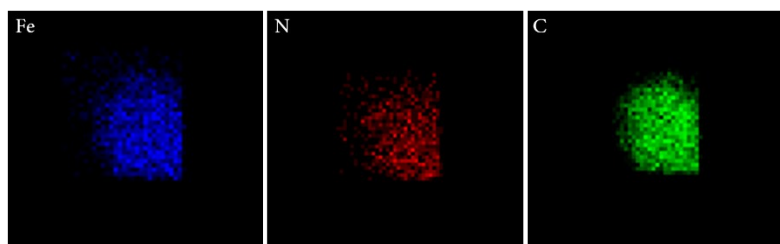

**Figure S1** Element mapping for the NGC-Fe sample.
